# Supplementary material
Source: PubMed Central journal article supplement (PMC5307468)
Supplement: pnas.1609411114.sapp.pdf [file pnas.1609411114.sapp.pdf]

# Heat-induced masculinization in domesticated zebrafish is family-specific and yields a set of different gonadal transcriptomes

Laia Ribas<sup>a,1</sup>, Woei Chang Liew<sup>b,1</sup>, Noèlia Díaz<sup>a,2</sup>, Rajini Sreenivasan<sup>b,3</sup>, László Orbán<sup>b,c,d,4</sup>, and Francesc Piferrer<sup>a,4</sup>

<sup>a</sup>Institut de Ciències del Mar, Consejo Superior de Investigaciones Científicas (CSIC), 08003 Barcelona, Spain; <sup>b</sup>Reproductive Genomics Group, Temasek Life Sciences Laboratory, 117604, Singapore; <sup>c</sup>Department of Animal Sciences and Animal Husbandry, Georgikon Faculty, University of Pannonia, Keszthely H-8360, Hungary; and <sup>d</sup>Centre for Comparative Genomics, Murdoch University, Murdoch, WA 6150, Australia

<sup>1</sup>L.R. and W.C.L. contributed equally to this work.

<sup>2</sup>Present address: Max Planck Institute for Molecular Biomedicine, 48149 Muenster, Germany.

<sup>3</sup>Present address: Laboratory of Endocrinology and Immunophysiology, Hudson Institute of Medical Research, Clayton, VIC 3168, Australia.

<sup>4</sup>To whom correspondence may be addressed. Email: [laszlo@tll.org.sg](mailto:laszlo@tll.org.sg) or [piferrer@icm.csic.es](mailto:piferrer@icm.csic.es)

## Supplementary Information Appendix

### Supplementary Materials and Methods

#### 5.1. Fish and Husbandry (Ethics Statement)

Fish were housed at the experimental aquarium facilities of the Institute of Marine Sciences (Barcelona) according to the approved institutional guidelines on the use of animals for research purposes and in agreement with the European regulations of animal welfare (ETS N8 123,01/01/91). The *Tg(vasa:vasa-egfp)* zebrafish line was maintained at Temasek Life Sciences Laboratory (TLL) Fish Facility according to the approved protocol by TLL Institutional Animal Care and Use Committee (approval ID: TLL (F)-10-001).

The AB zebrafish strain was used in all temperature treatment experiments. Brooders were maintained in 2.8-liter tanks (Aquaneering, mod. ZT280) at  $28 \pm 0.5^\circ\text{C}$ . Fish mating took place spontaneously in spawning tanks fitted with a mesh. Fertilized eggs were collected, counted and separated in Petri dishes containing embryo medium with methylene blue and maintained at  $26.5^\circ\text{C}$ . All eggs hatched at 3 days post fertilization (dpf) and larvae were maintained until 6 dpf without feeding to allow complete yolk sac absorption. Fish and larvae were kept under a 12 h light:12 h dark photoperiod and were fed with commercial food for zebrafish. First, larvae were fed three times a day with Sera micron (AquaSchwarz) until 15 dpf and then with a pelleted dried food of the appropriate size (AquaSchwarz) was supplemented with live *Artemia*

nauplii (AF48, INVE Aquaculture). In addition to temperature (to the nearest 0.1°C), pH (7.2), conductivity (750-900  $\mu$ S) and dissolved oxygen (6.5–7.0 mg/l) were monitored daily, whereas other water quality parameters (ammonium, nitrite and nitrate) were checked periodically to ensure that they were within the appropriate range (1–3). In order to avoid high rearing density-induced masculinization, the number of fish in each 2.8-liter tank was 25–35, as we previously described (4).

The *Tg(vasa:vasa-egfp)* transgenic zebrafish line (AB strain based) was a kind gift from Dr. Lisbeth Olsen (Sars International Centre for Marine Molecular Biology, Bergen, Norway). They were kept in AHAB (Aquatic Habitats) recirculation systems according to standard protocols (1–3) and at ambient temperature of 25–28°C. Breeding was carried out as for the AB zebrafish strain in meshed-bottom spawning cages of one liter volume placed into a second cage containing egg water. Breeding pairs were set up at the previous evening in the presence of artificial plants and fertilized eggs were collected from the bottom of the cage before noon next day, rinsed on a tea filter and transferred into plastic trays with egg water containing methylene blue. Embryos were transferred onto the AHAB system after hatching.

## 5.2. Temperature Treatments

First, we determined adult sex ratio of the families to be used without the heat treatment. Eleven different pairs of AB strain zebrafish were crossed (five of them between two and six times, the rest once), their offspring grown to maturity at control temperature (28°C) and the sex ratio was determined for each family. Families were randomly picked, numbered and the family numbers were maintained throughout the study. The sex ratios of the different pairs ranged from 13 to 100% males (Fig. 1A). Furthermore, for the five pairs that were crossed more than once, brood sex ratios between repeated crosses from the same pair were similar (standard deviations of within-family sex ratios were between 0.35 to 8.6% males; Fig. 1A). Both of these results have confirmed earlier findings of Liew and colleagues (5), showing the existence of an interfamily variation. Finally, Chi-squared analysis between the averaged sex ratio combining all families (62.8% males) and the expected Fisherian sex ratio (50% males) showed no significant differences ( $P > 0.05$ ) indicating that the overall sex ratio of all the populations used in our experiments combined had no a sex bias at control conditions.

Two thermal treatments were performed as follows: 1) In the first experiment, a total of ~2,500 larvae were obtained by eight different families (#3, 4, 5, 6, 7, 8, 10 and 11) submitted to three different thermal periods (0–14, 7–21 and 18–32 dpf) and to four different temperatures per period (low “LT” at 22°C, control “CT” at 28°C and high “HT” at 34°C or 36°C; 2) In the second experiment, a total of ~1,050 larvae from six different families (#1, 2, 4, 6, 8 and 9) and one period of thermal treatment (18–32 dpf) and two different thermal treatments per period (control “CT” at 28°C and high “HT” at

36°C) were studied. At the end of each treatment, fish were returned at 28°C. Temperature changes were carried out at a rate of 1–2°C/day.

Cold water was produced with a Titan 250 (AquaMedic) cooler circulating system, and warm water was generated by Jäger 50W (Eheim) heater. The water temperature was changed gradually at a rate of 2°C per day until the desired temperature was achieved. Individual tank temperatures were measured three times per day to ensure that constant temperatures were maintained throughout the treatment period. At the end of each experimental period, temperature was gradually adjusted to 28°C and then fish were returned to the racks.

### 5.3. Sampling Procedures

Regardless of the experimental treatment, tissues were collected at 37 dpf (juveniles) and at 90 dpf (adults). Animals were sacrificed by immersion into ice followed by decapitation. Biometry measurements (length and weight) were performed in all fish and survival was determined for each temperature treatment at 6, 50 and 90 dpf. Tissues were carefully dissected (gonads with adjacent parts of the body trunk for juveniles or completely isolated gonads for adults), flash frozen into liquid nitrogen and kept at –80°C for further analysis. Fish sex was individually determined after dissection and sex ratio was calculated for each biological replicate.

Trunk samples were dissected from euthanized juvenile zebrafish between the opercula and anal pore. The trunk was gutted carefully using ultra-fine (1 µm tip) tungsten dissecting needle (Roboz Surgical Instrument, Co.) under a stereo-microscope (Leica). The dissecting of *Tg(vasa:vasa-egfp)* juvenile zebrafish was performed under a stereo-microscope equipped with MAA-03 universal light source (BLS Ltd.) to ensure that the gonad (expressing *vasa-egfp*) was still intact in the trunk cavity after gutting.

### 5.4. Analysis of Dissected Gonads from Adult Fish

Dissected gonads from all adult individuals of all groups at the age of 90 dpf were analyzed. First, they were examined under the dissecting scope to visually assess the level of gonadal maturation based on their overall size, shape, color, and texture. Then a subset of them (13 males and 12 females, Table S6) was also analyzed histologically. Briefly, gonads were fixed in 4% paraformaldehyde in phosphate-buffered saline (PBS), pH 7.4, for 24 h at room temperature, washed for 24 h in PBS, dehydrated in an ascending series of ethanol concentrations, cleared in xylene and embedded in glycol methacrylate (JB-4; Polysciences, Inc.). Sections (3 µm thick) were cut using a microtome (Reichert-Jung 2040), float mounted on glass slides, stained with haematoxylin-eosin and mounted with DPX. Periodical sections covering the whole length of the gonad (min. 12 sections per gonad) were examined with a light microscope

(Zeiss AxioPlan 2) fitted with a MRc5 Axiocam digital camera. Images were stored and processed using Zeiss Axiovision AC v 4.4.0.0 imaging software.

Visual assessment of the gonadal maturation level under the dissecting scope allowed the classification of gonads into three types (Refs 6, 7; Table S1, Fig. S3). They were as follows:

Type 1: immature gonads. In females, type 1 ovaries had a pale yellow color. Microscopically this type of gonads contained few oocytes at stage I primary growth. In males, type 1 testes were semi-transparent/white and occupied only a small portion of the posterior part of the adipose tissue, in which they appeared imbedded. Microscopically, all germ cells were spermatogonia and spermatocytes, and the testicular lobes were defined.

Type 2: maturing and differentiating gonads. In females, type 2 ovaries contained more oocytes than type 1 but still not enough oocytes to fill the whole ovary and the color was still yellowish. Microscopically, in addition to some stage I oocytes, most of them were at stage II (cortical alveolus stage), but also in stage III (early-vitellogenic stage). In males, type 2 testes were white and surrounded by adipose tissue. Microscopically, spermatogonia, spermatocytes, spermatids and spermatozoa were observed.

Type 3: mature and differentiated gonads. In females, type 3 ovaries were big, filled with oocytes and had a yellow-orange color. Microscopically, most follicles were observed at stages III and stage IV (late-vitellogenic) but also some in stage III, II and few in stage I. In males, type 3 testes were white-beige, wider and partially covered by the adipose tissue. Microscopically, these testes contained less spermatids and more spermatozoa than type 2 testes.

Out of the 25 gonads analyzed histologically, none of them showed any sign of being intersex, i.e., an ovotestis that contained cells characteristic to both female and male gonads. Representative results of each gonadal type are shown in Fig. S3.

## **5.5. Microarray Analysis**

The custom designed zebrafish expression microarray used for this project contained probes for 31,477 unique sequences from NCBI Refseq, Ensembl Genes version e61, UCSC (danRer7 genome assembly) mRNA dataset and a gonadal EST library created previously in the Reproductive Genomics Group at TLL, Singapore (8). During the course of this project there were several updates and thus the probes were re-mapped to Ensembl transcriptome version e70. The microarray was manufactured by NimbleGen (Roche NimbleGen) on a 12x135 array format with each array containing 117,915 probes (length: 60 base pairs) with an average of 3 probes targeting each unique sequence.

We isolated the gonads from four adult females and 10 adult males at 90 dpf of each group (28°C and 36°C, Table S6). The maturity of the gonads used for the microarray analysis was the following:

For female gonads: FCT: four type 2 individuals; FHT1: two type 2 individuals; and FHT2: two type 1 individuals.

For male gonads: MCT: eight type 3 and two type 2 individuals; MHT1: six type 3 and two type 2 individuals; and MHT2: one type 3 and one type 2 individual.

Total RNA was extracted by Trizol (Life Technologies) according to the manufacturer's protocol and DNase treated (Invitrogen). RNA quality was checked by Experion Automated Electrophoresis Station (BioRad). Samples with RNA integrated quality (RIQ) number ranged from 7 to 9.9 (mean RIQ = 9) and were used for the microarray analysis. As the amount of total RNA obtained from the juveniles were not sufficient for microarray and qPCR validation, there was a need to perform whole transcriptome amplification (WTA). For consistency, both juvenile and adult total RNA samples (60 ng) were amplified using Ovation RNA Amplification System V2 (NuGEN). Size distribution of the amplified double stranded cDNA samples were analyzed by Agilent Bioanalyzer with RNA 6000 Nano Chip (Agilent Technologies) to ensure fragment size uniformity among the samples. Following WTA, 1 µg of the amplified cDNA were labeled using NimbleGen One-Color DNA Labelling Kit (Roche NimbleGen,) and hybridization was carried out according to the manufacturer's instructions with MAUI hybridization system (BioMicro Systems). Each sample, corresponding to the gonads of an individual fish, was hybridized separately. After an overnight hybridization (16–20 h) the slides were washed with NimbleGen Wash Buffer Kit (Roche NimbleGen) and scanned at 5 µm resolution with Axon GenePix 4000B Microarray scanner (Molecular Devices).

A total of 48 canonical genes were selected for their importance to reproduction and sex differentiation in fish (9–15) to study their expression among the different transcriptomic groups (Dataset S3).

## **5.6. Validation of Differential Gene Expression by qPCR Array**

A high throughput real-time qPCR array was designed to measure the expression level of 35 genes for validating the microarray result. The primers were designed using online software Primer-BLAST (16) and Real-time PCR Miner (17) was used to estimate the primer efficiency (refer to Table S7 for primer details).

qPCR analysis was performed using BioMark HD System (Fluidigm). All reactions were run in triplicates. The cDNA synthesized during WTA was used for the qPCR. Preparation of the BioMark Dynamic Array reactions was performed according to Fluidigm advance development protocol using EvaGreen DNA Binding Dye with 48.48 and 96.96 Dynamic Array IFCs (PN100-1208A1). Pre-amplification of cDNA

was performed using TaqMan PreAmp Master Mix (Life Technologies) with 50 nM of pooled primers and 1.25  $\mu$ l of cDNA. Pre-amplification reaction was carried out at 95°C for 10 min followed by 14 cycles of 95°C for 15 s and 60°C for 4 min. The amplified cDNA was diluted 1:5 with low EDTA-TE buffer. For loading the BioMark Dynamic Array, sample and assay mix was prepared according to manufacturer's protocol. Briefly, the sample mix was prepared by combining 2  $\mu$ l of diluted pre-amplified cDNA, 4.44  $\mu$ l of TaqMan Gene Expression Master Mix (Life Technologies), 0.443  $\mu$ l of 20x EvaGreen (Biotum), 0.443  $\mu$ l of 20x DNA Binding Dye Sample Loading Reagent (Fluidigm) and 0.67  $\mu$ l of low EDTA-TE buffer. The assay mix was prepared by combining 0.25  $\mu$ l each of the 100  $\mu$ M forward and reverse primer, 0.125  $\mu$ l of 10% Tween 20 (Sigma) and 4.375  $\mu$ l of low EDTA-TE buffer. After the reaction mixture was loaded into the chip, qPCR cycle was carried out on the BioMark HD System (Fluidigm). The qPCR protocol consisted of a thermal mix (50°C for 2 min, 70°C for 30 min, 25°C for 10 min) followed by uracil-DNA glycosylase (UDG) treatment and hot start (50°C for 2 min, 95°C for 10 min) then quantification (35 cycles of 96°C for 15 s then 60°C for 1 min). Melting curve analysis was performed at the end of the qPCR protocol between 55 to 95°C with 0.5°C increments.

## 5.7. Statistical Analysis

StatGraphics Centurion XVI.I software (OpenLand, Inc.) was used to analyze biometry results (weight and length), survival, gonad maturity and sex ratio. Prior to sex ratio analysis, the percent males/females for each biological replicate was arcsine transformed. Data were checked for normality using the Kolmogorov-Smirnov test and for homocedasticity of variances by the Levene's test. Means were compared by the Student's-*t* test or by one-way analysis of variance (ANOVA) with a Tukey's *posthoc* multiple range test. The Chi-squared test with arcsine transformation was used to study differences in gonad maturation and sex ratios.

## 5.8. Microarray Data Analysis

The microarray data were collected and analyzed according to MIAME guidelines (18). Raw fluorescent intensity data was retrieved from the scanned images by NimbleScan version 2.6 (Roche NimbleGen) according to the manufacturer's instructions. Robust multi-array average (19), quantile normalization and background correction were applied as implemented in NimbleScan to generate the Pair files. Then the Pair files were imported into Partek Genomic Suite version 6.6 (Partek Inc.) for analysis. Differentially expressed transcripts (DETs) were identified by ANOVA. The *P* value was adjusted to account for incorrectly rejected null hypothesis in multiple hypotheses testing using False Discovery Rate (FDR) step-up method (20) as implemented in Partek GS. DETs were filtered for significant ( $P \leq 0.01$ ) then by at least

1.5 fold change difference. Results were deposited at Gene Expression Omnibus (GEO) database (Accession number GSE51434).

### 5.9. qPCR Array Data Analysis

The Fluidigm Real-time PCR analysis software version 3.0.2 (Fluidigm) was used to check for amplification specificity using the melting curve data and to extract quantification cycle (Cq) data. PCR products with unacceptable melting curve were excluded in subsequent analysis. The Cq data were then imported into GenEx Pro version 5.4.2.128 (MultiD Analyses AB) for further analysis. Briefly, the Cq data were corrected for primer efficiency as implemented in GenEx. Outliers were identified by Grubb's test with 0.95 confidence level and 0.25 cutoff SD (cycle). The triplicate Cq data were then averaged and missing data were assigned the highest measured Cq for that gene of interest (GOI) plus one. Average Cq of the reference genes (RG) *eef1a111* and *rpl13a* were used for normalization ( $Cq_{(GOI)} - Cq_{(Avg\ RG)}$ ). Finally, relative quantity (RQ;  $2^{-\Delta\Delta Cq}$ ) was calculated using adult females or juveniles (group FCT1 or JCT1 respectively; see results) at control temperature as reference. The qPCR heatmap was generated using hierarchical clustering with normalized Cq data. Average linkage clustering method and Euclidean distance measurement was used as implemented in Partek GS.

### References

1. Westerfield M (1995) The zebrafish book. A guide for the laboratory use of zebrafish (*Danio rerio*), University of Oregon Press. Eugene.
2. Lawrence C (2007) The husbandry of zebrafish (*Danio rerio*): A review. *Aquaculture* 269(1–4): 1–20.
3. Ribas L & Piferrer F (2014) The zebrafish (*Danio rerio*) as a model organism, with emphasis on applications for finfish aquaculture research. *Rev Aquacult* 6(4): 209–240.
4. Ribas L, Valdivieso A, Díaz N & Piferrer F (2017) On the proper rearing density in domesticated zebrafish to avoid unwanted masculinization. Links with the stress response. *J Exp Biol* (in press).
5. Liew WC, *et al.* (2012) Polygenic sex determination system in zebrafish. *PLoS One* 7(4): e34397.
6. Selman K, Wallace R, Sarka A & Qi XP (1993) Stages of oocyte development in the zebrafish, *Brachydanio rerio*. *J Morphol* 218(2): 203–224.
7. Schulz RW, *et al.* (2010) Spermatogenesis in fish. *Gen Comp Endocrinol* 165: 390–411.

8. Tzung KW, *et al.* (2015) Early depletion of primordial germ cells in zebrafish promotes testis formation. *Stem Cell Rep* 4: 1–13.
9. Baroiller JF, Guiguen Y & Fostier A (1999) Endocrine and environmental aspects of sex differentiation in fish. *Cell Mol Life Sci* 55(6-7): 910–931.
10. Piferrer F & Guiguen Y (2008) Fish gonadogenesis. Part II: Molecular biology and genomics of sex differentiation. *Rev Fish Sci* 16(S1): 35–55.
11. Rodríguez-Marí A & Postlethwait JH (2011) The role of Fanconi anemia/BRCA genes in zebrafish sex determination. *The zebrafish: Disease models and chemical screens*, Methods in Cell Biology, eds. Detrich HW, Westerfield M, & Zon LI (Academic Press, San Diego), pp 461–490.
12. Pradhan A, *et al.* (2012) Activation of NF-kappa  $\beta$  protein prevents the transition from juvenile ovary to testis and promotes ovarian development in zebrafish. *J Biol Chem* 287(45): 37926–37938.
13. Shao CW, *et al.* (2014) Epigenetic modification and inheritance in sexual reversal of fish. *Genome Res* 24(4): 604–615.
14. Sreenivasan R, *et al.* (2014) Gonad differentiation in zebrafish is regulated by the canonical Wnt signaling pathway. *Biol Reprod* 90(2): 41–10.
15. Ribas L, *et al.* (2016) Comprehensive transcriptomic analysis of the process of gonadal sex differentiation in the turbot (*Scophthalmus maximus*). *Mol Cell Endocrinol* 422: 132–149.
16. Ye J, *et al.* (2012) Primer-BLAST: A tool to design target-specific primers for polymerase chain reaction. *BMC Bioinformatics* 13: 134.
17. Zhao S & Fernald RD (2005) Comprehensive algorithm for quantitative real-time polymerase chain reaction. *J Comput Biol* 12(8): 1047–1064.
18. Brazma A, *et al.* (2001) Minimum information about a microarray experiment (MIAME) - toward standards for microarray data. *Nat Genet* 29(4):365–371.
19. Irizarry RA, *et al.* (2003) Summaries of affymetrix GeneChip probe level data. *Nucleic Acids Res* 31(4): e15.
20. Benjamini Y & Hochberg Y (1995) Controlling the false discovery rate - a practical and powerful approach to multiple testing. *J R Stat Soc Series B Stat Methodol* 57(1): 289–300.



## Supplementary Tables

**Table S1.** Description (macroscopic and microscopic) of the different types of gonads found in adult zebrafish in this study

|               | Testis                                                                                                                                         |                                                             | Ovary                                                                                                                      |                                                                                                                                    |
|---------------|------------------------------------------------------------------------------------------------------------------------------------------------|-------------------------------------------------------------|----------------------------------------------------------------------------------------------------------------------------|------------------------------------------------------------------------------------------------------------------------------------|
|               | Macroscopic                                                                                                                                    | Microscopic<br>(germ cell stage)                            | Macroscopic                                                                                                                | Microscopic<br>(germ cell stage)                                                                                                   |
| <b>Type 1</b> | Size: clearly smaller than type 1 ovary<br>Shape: long and thin<br>Color: semi-transparent white<br>Texture: smooth                            | Spermatogonia<br>Spermatocytes                              | Size: clearly bigger than type 1 testis<br>Shape: round with protruding oocytes<br>Color: pale yellow<br>Texture: granular | Stage I: primary growth                                                                                                            |
| <b>Type 2</b> | Size: clearly bigger than type 1 testis<br>Shape: long<br>Color: white<br>Texture: smooth                                                      | Spermatogonia<br>Spermatocytes<br>Spermatids<br>Spermatozoa | Size: clearly bigger than type 1 ovary<br>Shape: round with protruding oocytes<br>Color: yellow<br>Texture: granular       | Stage I: primary growth<br>Stage II: cortical alveolus<br>Stage III: previtellogenic stage                                         |
| <b>Type 3</b> | Size: bigger than type 2 testis<br>Shape: long and thicker than type 2 testis<br>Color: white-beige<br>Texture: less smooth than type 2 testis | Spermatogonia<br>Spermatocytes<br>Spermatids<br>Spermatozoa | Size: bigger than type 2 ovary<br>Shape: round filled by oocytes<br>Color: yellow-orange<br>Texture: granular              | Stage I: primary growth<br>Stage II: cortical alveolus<br>Stage III: early vitellogenic stage<br>Stage IV: late vitellogenic stage |

**Table S2.** Description of gonadal profiles of fish defined by PCA analysis based on expression microarray data

| Abbreviation | Sample group                         | Description                                                                                                                                                                                                                                         |
|--------------|--------------------------------------|-----------------------------------------------------------------------------------------------------------------------------------------------------------------------------------------------------------------------------------------------------|
| FCT          | Female Control Temperature           | 90 dpf zebrafish with female phenotype at 28°C.                                                                                                                                                                                                     |
| FHT1         | Female High Temperature Group 1      | 90 dpf zebrafish with female phenotype heat-treated at 36°C between 18–32 dpf and clustered together with FCT on the PCA plot (Fig. 1E).                                                                                                            |
| FHT2         | Female High Temperature Group 2      | 90 dpf zebrafish with female phenotype heat-treated at 36°C between 18–32 dpf and formed distinct cluster closer to MCT on the PCA plot (Fig. 1E).                                                                                                  |
| MCT          | Male Control Temperature             | 90 dpf zebrafish with male phenotype at 28°C.                                                                                                                                                                                                       |
| MHT1         | Male High Temperature Group 1        | 90 dpf zebrafish with male phenotype heat-treated at 36°C between 18–32 dpf and clustered together with MCT on the PCA plot (Fig. 1E).                                                                                                              |
| MHT2         | Male High Temperature Group 2        | 90 dpf zebrafish with male phenotype heat-treated at 36°C between 18–32 dpf and formed distinct cluster on the PCA plot (Fig. 1E).                                                                                                                  |
| JCT1         | Juvenile Control Temperature Group 1 | 37 dpf zebrafish at 28°C that formed a distinct cluster on the PCA plot (Fig. 4A) and in the same clade with future female transgenic fish that displayed strong <i>vasa-egfp</i> fluorescent signal (Fig. 4B).                                     |
| JCT2         | Juvenile Control Temperature Group 2 | 37 dpf zebrafish at 28°C that formed a distinct cluster on the PCA plot (Fig. 4A) and in the same clade with future male transgenic fish that displayed weak <i>vasa-egfp</i> fluorescent signal (Fig. 4B).                                         |
| JHT          | Juvenile High Temperature            | 37 dpf zebrafish heat-treated at 36°C between 18–32 dpf that formed a distinct cluster on the PCA plot (Fig. 4A) and in the same clade with JCT2 and future male transgenic fish that displayed weak <i>vasa-egfp</i> fluorescent signal (Fig. 4B). |

**Table S3.** Validation of adult gonad microarray data by qPCR. Fold change values are compared to female control temperature (FCT) group. Significant values ( $P < 0.01$ ) are highlighted in green (in alphabetical order). For full gene names see Table S7

| Gene symbol      | FHT1       |       | FHT2       |        | MHT2       |           | MHT1       |         | MCT        |          |
|------------------|------------|-------|------------|--------|------------|-----------|------------|---------|------------|----------|
|                  | Microarray | qPCR  | Microarray | qPCR   | Microarray | qPCR      | Microarray | qPCR    | Microarray | qPCR     |
| <i>amh</i>       | 1.88       | 1.01  | 15.42      | 327.79 | 20.07      | 538.11    | 31.8       | 453.59  | 26.98      | 804.14   |
| <i>axin1</i>     | -1.14      | -1.47 | -7.09      | -12.53 | -17.1      | -11.83    | -8.21      | -7.32   | -6.84      | -7.29    |
| <i>ctnnbip1</i>  | 1.43       | -1.51 | -2.85      | -10.28 | -3.67      | -399.89   | -4.76      | -72.55  | -3.12      | -16.64   |
| <i>cyp11c1</i>   | 1.76       | -1.6  | 41.52      | 504.89 | 23.81      | 4.62      | 54.6       | 605.6   | 60.67      | 1.685.18 |
| <i>cyp19a1a</i>  | -1.1       | -5.57 | -11.81     | 54.81  | -19.11     | -24.96    | -18.74     | -112.32 | -18.11     | -41.85   |
| <i>cyp19a1b</i>  | -1.9       | -1.46 | -1.62      | -1.32  | 3.2        | -132.98   | -1.02      | -11.53  | 1.34       | -1.19    |
| <i>cyp26b1</i>   | 1.55       | 1.44  | 2.35       | 1.73   | 5.47       | -11.11    | 2.78       | -1.63   | 2.59       | 1.34     |
| <i>dkk3</i>      | 1          | -1.27 | 7.04       | 12.77  | 2.51       | -1.97     | 4.49       | 4.36    | 3.88       | 7.56     |
| <i>dmrt1</i>     | 1.32       | -1.08 | 3.4        | 8.79   | 5.23       | 7.92      | 6.02       | 17.61   | 6.29       | 30.61    |
| <i>dnd</i>       | -1.14      | -1.32 | -3.61      | -6.03  | -5.24      | -7.335.78 | -3.84      | -8.71   | -2.82      | -2.21    |
| <i>dnmt3bb.2</i> | 1.05       | 1.13  | -4.89      | -8.58  | -4.43      | -4.64     | -5.3       | -17.17  | -4.99      | -8.71    |
| <i>esr2b</i>     | 1.21       | -1.85 | 4.44       | 13.01  | 7.16       | -2.23     | 6.57       | 12.37   | 8.21       | 24.53    |
| <i>fancl</i>     | -1.44      | -2.67 | -6.75      | -55.42 | -10.19     | -2.578.73 | -7.26      | -60.19  | -6.17      | -15.99   |
| <i>foxl2</i>     | 1.29       | -1.02 | -8.82      | -10.34 | -10.91     | -36.25    | -5.07      | -22.95  | -4.88      | -17.45   |
| <i>fshr</i>      | 1.04       | 1.33  | 1.34       | 5.98   | -1.14      | 7.69      | 2.15       | 12.35   | 4.63       | 15.25    |
| <i>ift57</i>     | -1.28      | -1.48 | 3.53       | 4.09   | 3.39       | 4.41      | 4.07       | 7.87    | 3.92       | 11.86    |
| <i>ift81</i>     | 1.26       | -1.37 | 6.62       | 16.57  | 12.22      | 38.81     | 14.76      | 41.77   | 12.35      | 36.02    |
| <i>ints3</i>     | 1.1        | 1.14  | -1.49      | -16.4  | -2.15      | -11.98    | -2.27      | -13.77  | -2.3       | -24.01   |
| <i>lhcgr</i>     | 1.34       | -1.19 | 1.03       | 2.33   | -1.28      | -1.43     | 3.04       | 1.97    | 2.05       | 4.02     |
| <i>naa35</i>     | -1.08      | -6.38 | 1.42       | -1.37  | 1.34       | -19.83    | 1.49       | -1.07   | 1.47       | -1.31    |
| <i>nabp1a</i>    | -1         | -1.23 | -1.39      | -5.38  | -1.89      | -8.04     | -1.83      | -5.44   | -1.72      | -5.59    |
| <i>nr0b1</i>     | 1.08       | -2.38 | -1.17      | -7.71  | -1.84      | -12.89    | -1.99      | -4.29   | -1.48      | -1.13    |
| <i>odf3b</i>     | -1.37      | -1.7  | 18.85      | 73.27  | 23.05      | 95.46     | 24.44      | 110.98  | 19.29      | 116.24   |

|                 |       |       |       |        |        |           |        |         |        |         |
|-----------------|-------|-------|-------|--------|--------|-----------|--------|---------|--------|---------|
| <i>piwil1</i>   | -1.24 | -1.49 | 1.56  | 1.26   | -1.11  | -1.06     | 1.59   | 2.16    | 2.14   | 3.23    |
| <i>pou5f3</i>   | -1.07 | -1.63 | -8.58 | -8.76  | -10.6  | -9.36     | -22.28 | -28.02  | -25.52 | -20.74  |
| <i>prkcz</i>    | -1.08 | 1.46  | -1.34 | -1.78  | -1.17  | -17.65    | -1.8   | -4.01   | -1.38  | -5.35   |
| <i>star</i>     | 1.29  | 1.78  | 14.35 | 61.13  | 18.91  | 2.53      | 18.53  | 92.05   | 19.89  | 248.51  |
| <i>sycp3</i>    | 1.49  | 1.06  | 16.36 | 46.68  | 22.18  | 42.85     | 25.97  | 75.15   | 26.74  | 188.31  |
| <i>tbp</i>      | 1     | -1.64 | -6.88 | -41.39 | -5.74  | -1.198.54 | -7.8   | -98.29  | -6.42  | -31.19  |
| <i>tdrd7</i>    | -1.14 | -1.88 | 1.19  | -13.8  | 1.46   | -14.52    | 1.46   | -3.35   | 1.36   | 4.47    |
| <i>ticrr</i>    | -1.06 | -1.69 | -2.83 | -3.51  | -18.19 | -2.89     | -3.37  | -2.5    | -2.76  | -1.68   |
| <i>tnfsf10l</i> | -1.03 | 2.32  | 3.3   | 13.31  | 2.84   | -2.29     | 4.74   | 10.1    | 3.18   | 24.89   |
| <i>tsc1a</i>    | -1.11 | -1.16 | -2.8  | -7.77  | -5.32  | -31.77    | -3.64  | -12.38  | -3.49  | -6.37   |
| <i>vtg5</i>     | 1.15  | 2.14  | -1.7  | -4.98  | -5.03  | -2.214.27 | -6.56  | -453.64 | -5.39  | -120.07 |
| <i>zp2.1</i>    | 1.23  | 1.06  | -1.08 | -1.1   | -19.5  | -96.9     | -18.63 | -98.31  | -16.25 | -52.03  |

**Table S4.** Validation of juvenile microarray data by qPCR. Fold change values are compared to JCT1. Significant values ( $P < 0.05$  or  $< 0.01$ ) are highlighted in blue or green, respectively (in alphabetical order). For full gene names see Table S7

| Gene symbol      | JCT2       |        | JHT        |         |
|------------------|------------|--------|------------|---------|
|                  | Microarray | qPCR   | Microarray | qPCR    |
| <i>amh</i>       | 1.04       | 1.25   | 1.04       | 2.62    |
| <i>axin1</i>     | 1.05       | 1.11   | -1.38      | 1.68    |
| <i>cyp11c1</i>   | 1.17       | 1.11   | 1.83       | 4.13    |
| <i>cyp19a1a</i>  | -2.21      | -3.39  | -2.05      | -3.04   |
| <i>cyp19a1b</i>  | 1.61       | -8.23  | 1.64       | -2.61   |
| <i>ddx4</i>      | -5.41      | -2.47  | -23.38     | -44.84  |
| <i>dkk3</i>      | 1.3        | 1.53   | 1.59       | 2.64    |
| <i>dmrt1</i>     | -1.13      | 1.43   | -1.46      | 1.6     |
| <i>dnd</i>       | -8.94      | -19.27 | -35.74     | -225.91 |
| <i>dnmt3bb.2</i> | -1.75      | -3.27  | -1.55      | -2.09   |
| <i>esr2b</i>     | 1.16       | 2.27   | -2.99      | -1.28   |
| <i>exosc8</i>    | -1.01      | -1.54  | 1.01       | -1.14   |
| <i>fancl</i>     | -1.53      | -1.97  | -1.49      | -2.28   |
| <i>foxl2</i>     | -2.05      | -6.53  | 1.05       | 1.32    |
| <i>fshr</i>      | -1.16      | -3.39  | -1.57      | -3.05   |
| <i>ift57</i>     | -1.48      | -1.67  | 1.61       | 1.83    |
| <i>ift81</i>     | 1.2        | -5.19  | -1.01      | -2.58   |
| <i>nabp1a</i>    | -1.06      | -1.32  | 1          | -1.06   |
| <i>odf3b</i>     | -2.08      | -7.66  | 1.39       | -1.17   |
| <i>pou5f3</i>    | -5.72      | -2.63  | -8.72      | -2.55   |
| <i>star</i>      | 1.01       | 2.06   | 1.36       | 2.69    |
| <i>sycp3</i>     | -1.47      | -3.27  | -1.22      | -4.19   |
| <i>tbp</i>       | -1.28      | -2.69  | -1.3       | -2.14   |
| <i>tsc1a</i>     | -1.04      | -1.04  | 1.06       | 1.01    |
| <i>vtg5</i>      | -1.06      | 1.01   | -2.66      | -8.51   |
| <i>zp2.1</i>     | -8.67      | -12.6  | -132.73    | -201.91 |

**Table S5.** Type of heat effect on genes in juveniles and adults. Juvenile values are fold change of JHT compared to JCT1. Significant values ( $P < 0.01$ ) are highlighted in grey.

For full gene names see Table S7

| Gene            | Accession number | Type of effect | FDR ( $P < 0.01$ ) | FC Juveniles | FDR ( $P < 0.01$ ) | FC Adults |
|-----------------|------------------|----------------|--------------------|--------------|--------------------|-----------|
| <i>axin1</i>    | NM_131503        | Permanent      | 0.011              | -1.452       | 0.000              | -4.211    |
| <i>ctnnbip1</i> | NM_131594        | Permanent      | 0.044              | -1.290       | 0.001              | -1.829    |
| <i>ddx4</i>     | NM_131057        | Permanent      | 0.000              | -10.725      | 0.007              | -1.635    |
| <i>dgcr8</i>    | NM_001122749     | Permanent      | 0.002              | -1.176       | 0.000              | -1.924    |
| <i>dkk3</i>     | NM_001089545     | Permanent      | 0.027              | 1.416        | 0.009              | 2.132     |
| <i>dnd</i>      | NM_212795        | Permanent      | 0.000              | -13.174      | 0.001              | -2.592    |
| <i>ift57</i>    | NM_001001832     | Permanent      | 0.000              | 1.912        | 0.000              | 1.747     |
| <i>pou5f3</i>   | NM_131112        | Permanent      | 0.001              | -3.754       | 0.017              | -1.888    |
| <i>cyp26b1</i>  | NM_212666        | Transient      | 0.009              | 1.356        | 0.055              | 2.227     |
| <i>nr0b1</i>    | NM_001082947     | Transient      | 0.003              | -2.760       | 0.382              | -1.206    |
| <i>piwil1</i>   | NM_183338        | Transient      | 0.000              | -5.107       | 0.061              | -1.233    |
| <i>piwil2</i>   | NM_001080199     | Transient      | 0.000              | -3.831       | 0.088              | -1.217    |
| <i>rspo1</i>    | NM_001002352     | Transient      | 0.041              | -1.272       | 0.116              | 1.641     |
| <i>sox9a</i>    | NM_131643        | Transient      | 0.004              | 1.363        | 0.958              | -1.008    |
| <i>tdrd7</i>    | NM_001099343     | Transient      | 0.002              | -2.797       | 0.087              | 1.130     |
| <i>vtg5</i>     | NM_001025189     | Transient      | 0.004              | -2.519       | 0.241              | -1.260    |
| <i>wnt4b</i>    | NM_131500        | Transient      | 0.002              | 2.661        | 0.894              | 1.095     |
| <i>zp2.1</i>    | NM_131330        | Transient      | 0.000              | -39.002      | 0.797              | -1.136    |
| <i>esr2b</i>    | NM_174862        | Inconsistent   | 0.000              | -3.428       | 0.003              | 1.967     |
| <i>foxl2</i>    | NM_001045252     | Inconsistent   | 0.042              | 1.581        | 0.002              | -4.439    |
| <i>amh</i>      | NM_001007779     | Delayed        | 0.898              | 1.037        | 0.000              | 3.387     |
| <i>cyp11c1</i>  | NM_001080204     | Delayed        | 0.158              | 1.529        | 0.000              | 4.036     |
| <i>cyp19a1a</i> | NM_131154        | Delayed        | 0.200              | -1.433       | 0.000              | -3.530    |
| <i>dmrt1</i>    | NM_205628        | Delayed        | 0.070              | -1.304       | 0.000              | 1.681     |
| <i>dnmt3b</i>   | NM_131386        | Delayed        | 0.126              | -1.225       | 0.000              | -2.084    |
| <i>fancl</i>    | NM_212982        | Delayed        | 0.174              | -1.240       | 0.000              | -3.339    |
| <i>ift81</i>    | NM_001002313     | Delayed        | 0.797              | -1.064       | 0.000              | 2.560     |
| <i>ints3</i>    | NM_001044932     | Delayed        | 0.850              | -1.030       | 0.033              | -1.180    |
| <i>nabp1a</i>   | NM_001008643     | Delayed        | 0.745              | 1.037        | 0.006              | -1.235    |
| <i>odf3b</i>    | NM_199958        | Delayed        | 0.069              | 2.348        | 0.000              | 4.746     |
| <i>sox9b</i>    | NM_131644        | Delayed        | 0.460              | 1.291        | 0.009              | -4.114    |
| <i>star</i>     | NM_131663        | Delayed        | 0.207              | 1.463        | 0.000              | 3.693     |
| <i>sycp3</i>    | NM_001040350     | Delayed        | 0.811              | -1.065       | 0.000              | 3.684     |
| <i>tbp</i>      | NM_200096        | Delayed        | 0.122              | -1.168       | 0.000              | -2.480    |
| <i>ticrr</i>    | NM_001003887     | Delayed        | 0.185              | -1.376       | 0.000              | -4.317    |
| <i>tnfsf10l</i> | NM_131843        | Delayed        | 0.166              | 1.104        | 0.024              | 1.717     |
| <i>tsc1a</i>    | NM_200052        | Delayed        | 0.390              | 1.112        | 0.043              | -2.067    |
| <i>cyp19a1b</i> | NM_131642        | None           | 0.068              | 1.419        | 0.560              | 1.215     |
| <i>exosc8</i>   | NM_001002865     | None           | 0.850              | 1.027        | 0.277              | -1.187    |
| <i>fshr</i>     | NM_001001812     | None           | 0.093              | -1.517       | 0.158              | -1.985    |
| <i>lhcgrr</i>   | NM_205625        | None           | 0.719              | -1.125       | 0.130              | -1.595    |
| <i>naa35</i>    | NM_199550        | None           | 0.296              | 1.202        | 0.241              | 1.137     |

|               |              |      |       |        |       |        |
|---------------|--------------|------|-------|--------|-------|--------|
| <i>nr3c1</i>  | NM_001020711 | None | 0.075 | 1.221  | 0.737 | 1.096  |
| <i>nr5a1a</i> | NM_131794    | None | 0.892 | 1.021  | 0.557 | -1.182 |
| <i>nr5a1b</i> | NM_212834    | None | 0.368 | -1.268 | 0.140 | -1.722 |
| <i>prkcz</i>  | NM_001030091 | None | 0.279 | -1.234 | 0.771 | -1.068 |
| <i>rbm8a</i>  | NM_001013345 | None | 0.346 | 1.040  | 0.423 | 1.068  |
| <i>sox3</i>   | NM_001001811 | None | 0.135 | 1.445  | 0.554 | -1.360 |
| <i>tp53</i>   | NM_001271820 | None | 0.519 | 1.131  | 0.264 | -1.119 |
| <i>wnt4a</i>  | NM_001040387 | None | 0.262 | 1.292  | 0.558 | -1.241 |

FC = Fold Change

FDR = False Discovery Rate

**Table S6.** Macroscopic sexing results are confirmed by either histology or gonadal transcriptomics in over 96% of zebrafish adults tested

| <b>Fish ID</b> | <b>Macroscopic sex</b> | <b>Macroscopic assigned gonadal type</b> | <b>Histological sex</b> | <b>Sex based on gonadal transcriptome</b> | <b>Group label used in the MS</b> |
|----------------|------------------------|------------------------------------------|-------------------------|-------------------------------------------|-----------------------------------|
| 1              | F                      | Type 1                                   | F                       | ND                                        | NA                                |
| 2              | F                      | Type 1                                   | F                       | ND                                        | NA                                |
| 3              | F                      | Type 1                                   | F                       | ND                                        | NA                                |
| 4              | F                      | Type 1                                   | F                       | ND                                        | NA                                |
| 5              | F                      | Type 1                                   | F                       | ND                                        | NA                                |
| 6              | F                      | Type 2                                   | F                       | ND                                        | NA                                |
| 7              | F                      | Type 2                                   | F                       | ND                                        | NA                                |
| 8              | F                      | Type 2                                   | F                       | ND                                        | NA                                |
| 9              | F                      | Type 2                                   | F                       | ND                                        | NA                                |
| 10             | F                      | Type 3                                   | F                       | ND                                        | NA                                |
| 11             | F                      | Type 3                                   | F                       | ND                                        | NA                                |
| 12             | F                      | Type 3                                   | F                       | ND                                        | NA                                |
| 13             | M                      | Type 1                                   | M                       | ND                                        | NA                                |
| 14             | M                      | Type 1                                   | M                       | ND                                        | NA                                |
| 15             | M                      | Type 1                                   | M                       | ND                                        | NA                                |
| 16             | M                      | Type 1                                   | M                       | ND                                        | NA                                |
| 17             | M                      | Type 1                                   | M                       | ND                                        | NA                                |
| 18             | M                      | Type 1                                   | M                       | ND                                        | NA                                |
| 19             | M                      | Type 2                                   | M                       | ND                                        | NA                                |
| 20             | M                      | Type 2                                   | M                       | ND                                        | NA                                |
| 21             | M                      | Type 2                                   | M                       | ND                                        | NA                                |
| 22             | M                      | Type 2                                   | M                       | ND                                        | NA                                |
| 23             | M                      | Type 3                                   | M                       | ND                                        | NA                                |
| 24             | M                      | Type 3                                   | M                       | ND                                        | NA                                |
| 25             | M                      | Type 3                                   | M                       | ND                                        | NA                                |
| 26             | F                      | Type 2                                   | ND                      | F                                         | FCT                               |
| 27             | F                      | Type 2                                   | ND                      | F                                         | FCT                               |
| 28             | F                      | Type 2                                   | ND                      | F                                         | FCT                               |
| 29             | F                      | Type 2                                   | ND                      | F                                         | FCT                               |
| 30             | F                      | Type 2                                   | ND                      | F                                         | FHT1                              |
| 31             | F                      | Type 2                                   | ND                      | F                                         | FHT1                              |
| 32             | F                      | Type 1                                   | ND                      | M                                         | FHT2                              |
| 33             | F                      | Type 1                                   | ND                      | M                                         | FHT2                              |
| 34             | M                      | Type 3                                   | ND                      | M                                         | MCT                               |
| 35             | M                      | Type 3                                   | ND                      | M                                         | MCT                               |
| 36             | M                      | Type 3                                   | ND                      | M                                         | MCT                               |
| 37             | M                      | Type 3                                   | ND                      | M                                         | MCT                               |
| 38             | M                      | Type 3                                   | ND                      | M                                         | MCT                               |



|    |   |        |    |   |      |
|----|---|--------|----|---|------|
| 39 | M | Type 3 | ND | M | MCT  |
| 40 | M | Type 3 | ND | M | MCT  |
| 41 | M | Type 3 | ND | M | MCT  |
| 42 | M | Type 2 | ND | M | MCT  |
| 43 | M | Type 2 | ND | M | MCT  |
| 44 | M | Type 3 | ND | M | MHT1 |
| 45 | M | Type 3 | ND | M | MHT1 |
| 46 | M | Type 3 | ND | M | MHT1 |
| 47 | M | Type 3 | ND | M | MHT1 |
| 48 | M | Type 3 | ND | M | MHT1 |
| 49 | M | Type 3 | ND | M | MHT1 |
| 50 | M | Type 2 | ND | M | MHT1 |
| 51 | M | Type 2 | ND | M | MHT1 |
| 52 | M | Type 3 | ND | M | MHT2 |
| 53 | M | Type 2 | ND | M | MHT2 |

F = female

M = male

MS = manuscript

ND = not determined

NA = not applicable

\* Yellow shading indicates contrasting results between macroscopic and transcriptomic sexing

**Table S7.** Gene symbols, names, Refseq IDs and primer sequences for all genes used in qPCR array (in alphabetical order)

| <b>Gene symbol</b> | <b>Gene name</b>                                        | <b>Refseq ID</b> | <b>Forward primer (5'-3')</b>  | <b>Reverse primer (5'-3')</b> |
|--------------------|---------------------------------------------------------|------------------|--------------------------------|-------------------------------|
| <i>amh</i>         | anti-Müllerian hormone                                  | NM_001007779     | ACAACCCGAAGGTCAACCCGC          | GTGGCATGTTGGTCAGTTGGCTG       |
| <i>axin1</i>       | axin 1                                                  | NM_131503        | ACCTGCTGACGACATGGAGAGG         | AATGCTCCCGTAAGGGCCCC          |
| <i>ctnnbip1</i>    | catenin beta interacting protein 1                      | NM_131594        | CTGTCGGGATGTGACCCCGG           | CTCCTGACGCACCGCTCTCC          |
| <i>cyp11c1</i>     | cytochrome P450, family 11, subfamily C, polypeptide 1  | NM_001080204     | CCTCGGGCCCATATACAGAGA          | CGTCCCGTTCTTGAGGAAGA          |
| <i>cyp19a1a</i>    | cytochrome P450, family 19, subfamily A, polypeptide 1a | NM_131154        | GATATTTGCTCAGAGCCATGGA         | GCTCTGGCCAGCTAAAACACT         |
| <i>cyp19a1b</i>    | cytochrome P450, family 19, subfamily A, polypeptide 1b | NM_131642        | AAAGAGTTACTAATAAAGATCCACCGGTAT | TCCACAAGCTTTCCCATTTC          |
| <i>cyp26b1</i>     | cytochrome P450, family 26, subfamily b, polypeptide 1  | NM_212666        | GCAAGCTGCCCATGCCCAAG           | GCATGGAAACCTGCACCCTGAAAG      |
| <i>ddx4</i>        | DEAD (Asp-Glu-Ala-Asp) box polypeptide 4                | NM_131057        | AAGGGCTGCAATGTTCTGTG           | CTCAGGCCAATCTTTCCACG          |
| <i>dkk3</i>        | dickkopf homolog 3                                      | NM_001089545     | GCATGTGGCTCACGGACAAACC         | TTCTCCATCTGATGCACAGCCTCC      |
| <i>dmrt1</i>       | doublesex and mab-3 related transcription factor 1      | NM_205628        | TGCCCAGGTGGCGTTACGG            | CGGGTGATGGCGGTCCTGAG          |
| <i>dnd</i>         | dead end                                                | NM_212795        | TCGTGGAAGCTTTTCGGAACCGG        | TGTCCTCGACGCGCTTGGAC          |

|                 |                                                            |              |                         |                         |
|-----------------|------------------------------------------------------------|--------------|-------------------------|-------------------------|
| <i>dnmt3bb2</i> | DNA (cytosine-5-)-methyltransferase 3 beta, duplicate b.2  | NM_131386    | CGACTCCCTACGTGATAGCGACC | CCATAACCACCACCGTCCGTCC  |
| <i>eef1a1l1</i> | eukaryotic translation elongation factor 1 alpha 1, like 1 | NM_131263    | GGAGGCTGCCAACTTCAACGC   | GGCGATGTGAGCAGTGTGGC    |
| <i>esr2b</i>    | estrogen receptor 2b                                       | NM_174862    | CACGTTCACACAGCGCCTGG    | GCTCGCGGAGGGATTCAAGC    |
| <i>exosc8</i>   | exosome component 8                                        | NM_001002865 | CTGTTCGTCCAGATGGAAGGG   | TCACCAGTGCTGATCCATCG    |
| <i>fancl</i>    | Fanconi anemia, complementation group L                    | NM_212982    | ACACTCCAGCTGAAGGCAGAGG  | CCAAGGTGCTCTGAGAGGTCCAC |
| <i>foxl2</i>    | forkhead box L2                                            | NM_001045252 | AAACACTGGGAAGGTTTGCCTGC | TTTGTCCGGCCCCTTCTCTGG   |
| <i>fshr</i>     | follicle stimulating hormone receptor                      | NM_001001812 | TCGTGAGATAGACAGCCATGC   | GAGATATCCAGAACGACGGGG   |
| <i>ift57</i>    | intraflagellar transport protein 57                        | NM_001001832 | GAGGTGGAGCGAGTTCTTCC    | GACAACCCTTGGCATCTTGC    |
| <i>ift81</i>    | intraflagellar transport 81 homolog                        | NM_001002313 | AATGGACGTACAGGTGCGG     | CTGACGGAGAACCTTGCCC     |
| <i>ints3</i>    | integrator complex subunit 3                               | NM_001044932 | TGGACCATGGTACGACAAGC    | CCATGAACCTCTCTCGGAGC    |
| <i>lhcg</i>     | luteinizing hormone/choriogonadotropin receptor            | NM_205625    | AGTTTCGACGGCCTGAAAGG    | CTGGATTGAGATCTCGGAGACG  |
| <i>naa35</i>    | N(alpha)-acetyltransferase 35, NatC auxiliary subunit      | NM_199550    | TCTGAGAGTGACGGGAATGC    | GTTCCACCTCAGGATCTCGC    |
| <i>nabp1a</i>   | nucleic acid binding protein 1a                            | NM_001008643 | GCTGCTAGCACAAGCTAACC    | TGGCACAGTTCCATTACCTGC   |
| <i>nr0b1</i>    | nuclear receptor subfamily 0, group B, member 1            | NM_001082947 | TAACGGCGGAGTGGCGTTGAC   | GTTGACACTGCAGCCCAGCAAC  |
| <i>odf3b</i>    | outer dense fiber of sperm tails 3B                        | NM_199958    | AAACTCCAGGTCCAGCTGCGTAC | ACCGCTGAAGGAGACGTTTGGG  |
| <i>piwil1</i>   | piwi-like RNA-mediated                                     | NM_183338    | ATCTCAAGAGGCTGCAAAGC    | CACCTCTCTCCCCGATCTTC    |

|                 |                                                                    |              |                          |                           |
|-----------------|--------------------------------------------------------------------|--------------|--------------------------|---------------------------|
| <i>pou5f3</i>   | gene silencing 1<br>POU domain, class 5,<br>transcription factor 3 | NM_131112    | GGAAGGCACAGTCCGTTCTGC    | CGCACTACATCTCTCTCCAGGCC   |
| <i>prkcz</i>    | protein kinase C, zeta                                             | NM_001030091 | ACTCCTCCTGCACGTATTTCC    | CGGTACAGCTTCCTCCATCG      |
| <i>rpl13</i>    | ribosomal protein L13                                              | NM_198143    | TCTGGAGGACTGTAAGAGGTATGC | AGACGCACAATCTTGAGAGCAG    |
| <i>star</i>     | steroidogenic acute<br>regulatory protein                          | NM_131663    | TGAACAAGCTCTCCGGACCTGG   | CAATTGGACTGCTGAGCAAGGAGC  |
| <i>sycp3</i>    | synaptonemal complex<br>protein 3                                  | NM_001040350 | AGCGGATCTGACGAAGACACGAG  | ATGTCCGCACCAAATCTTTCCAGC  |
| <i>tbp</i>      | TATA box binding protein                                           | NM_200096    | ATGTTTTGCGCGCTCCCTGC     | AGCAGTGGTTCAGGGCTTCCC     |
| <i>tdrd7a</i>   | tudor domain containing 7a                                         | NM_001099343 | TCGCATAACGTCAAACCTCGCTTG | TCTGGAGGAGGGCAGGTCGG      |
| <i>ticrr</i>    | TopBP1-interacting,<br>checkpoint, and replication<br>regulator    | NM_001003887 | AAGACTCAGGGGGACAGTGG     | CTGAAGTGCAAGAGGCCAGG      |
| <i>tnfsf10l</i> | tumor necrosis factor<br>(ligand) superfamily,<br>member 10 like   | NM_131843    | TCGTCCTGCAGATCGCGTCC     | AACCCCTGACTCTTAACCTGCG    |
| <i>tsc1a</i>    | tuberous sclerosis 1a                                              | NM_200052    | GTACCCAGGCTAAGACGTGC     | ACTGGAGTCTTGGCATCACC      |
| <i>vtg5</i>     | vitellogenin 5                                                     | NM_001025189 | AAGGCCCTGCCAACTGACCG     | TGGGTCCAGTAACCATCGGTATTGC |
| <i>zp2.1</i>    | zona pellucida glycoprotein<br>2, tandem                           | NM_131330    | CCCACAGTCTCTGTCTCCTGTGC  | TTCCTTGCGCAACTCTGCTCAC    |

---

## Supplementary Datasets

- **Dataset S1.** Principal Component Analysis (PCA) loading scores of all transcripts, plus those for the FHT2 vs. FCT and MHT2 vs. MCT DETs. See Table S2 for group abbreviations.
  
- **Dataset S2.** Differentially expressed transcripts lists from adults and juveniles based on microarray data. All adult groups are compared to FCT: FHT1 vs. FCT, FHT2 vs. FCT, MHT1 vs. FCT, MHT2 vs. FCT and MCT vs. FCT. All juvenile groups are compared to JCT1: JCT2 vs. JCT1, JHT vs. JCT1. Fold change: 1.5x; False Discovery Rate,  $P \leq 0.01$ . See Table S2 for group abbreviations.
  
- **Dataset S3.** Canonical genes with reproduction-related function differentially expressed in the pairwise comparisons of gonadal gene expression profile groups.
  
- **Dataset S4.** Gene Ontology term lists of adults and juveniles. All adult groups are compared to FCT: FHT1 vs. FCT, FHT2 vs. FCT, MHT1 vs. FCT, MHT2 vs. FCT and MCT vs. FCT. All juvenile groups are compared to JCT1: JCT2 vs. JCT1, JHT vs. JCT1. Fold change: 1.5; False Discovery Rate,  $P \leq 0.05$ . See Table S2 for group abbreviations.
  
- **Dataset S5.** Differentially expressed KEGG lists of adults and juveniles comparisons. Adult groups are compared to FCT: FHT1 vs. FCT, FHT2 vs. FCT, MHT1 vs. FCT, MHT2 vs. FCT and MCT vs. FCT (Fold Change: 1.5; False Discovery Rate,  $P \leq 0.05$ ). Juvenile groups are compared to JCT1: JCT2 vs. JCT1 and JHT vs. JCT1 (unadjusted  $P \leq 0.05$ ). See Table S2 for group abbreviations.

## Supplementary Figures

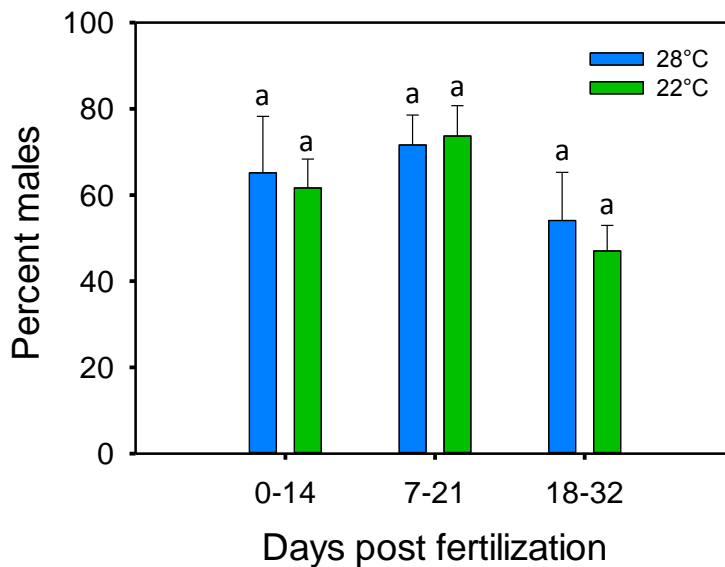

**Fig. S1.** Sex ratio of zebrafish families subjected to 22°C during three different periods of gonad development. The data of six different families (#3, 5–8 and 10) out of the eight initially tested was used (#4 and 11 did not have enough animals). The mean  $\pm$  s.e.m. represents data between three to five independent replicates for each temperature and each studied period. Sex ratio data was obtained from a total of 812 fish (454 and 358 fish for 22°C and 28°C, respectively). No statistically significant differences were found between the two temperatures at the three different tested periods ( $P < 0.05$ ; Chi-squared test).

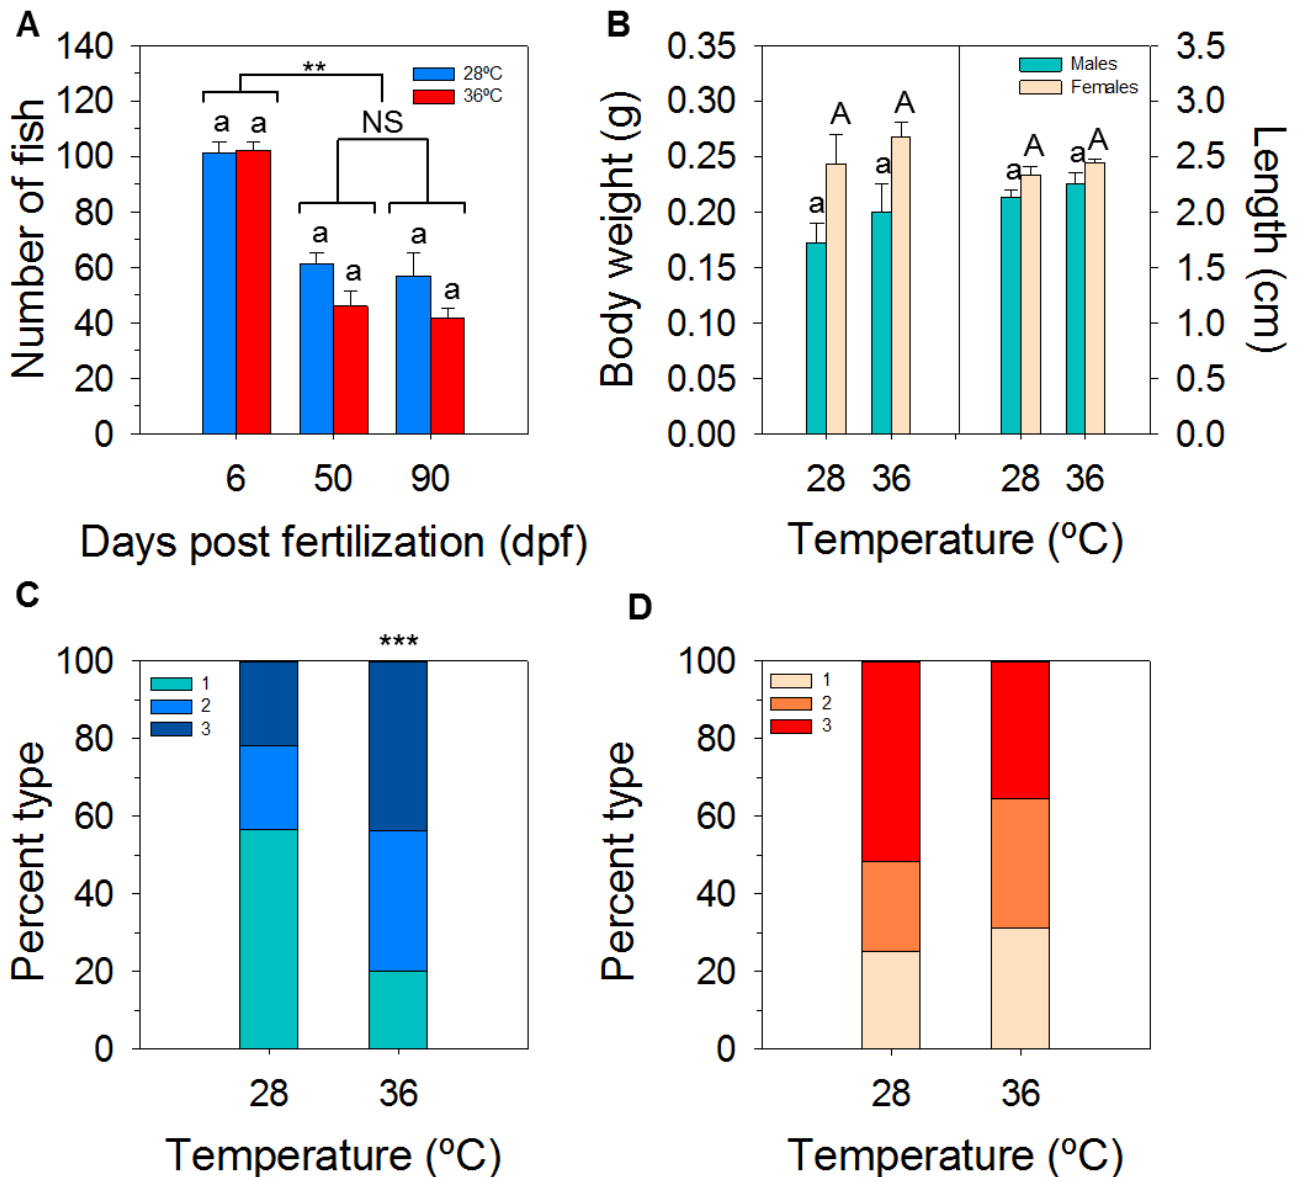

**Fig. S2.** Survival, growth and degree of gonadal maturation of zebrafish exposed to high temperature. A total of ~2,000 zebrafish larvae originating from 11 different pairs were used for these experiments. **(A)** The number of surviving fish per temperature treatment (28 or 36°C) at three different periods during development: in larvae, after being transferred from the Petri dishes to the rearing tanks at 6 dpf; in juveniles, at completion of sex differentiation (50 dpf); and in adults, at the end of the experiment (90 dpf). **(B)** Body weight (left panel) and standard length (right panel) of males and females at 90 dpf and at two different temperatures (28 and 36°C). **(C)** Male gonad maturation level (types 1, 2 and 3) at 90 dpf at two different temperatures. **(D)** Female gonad maturation level (types 1, 2 and 3) at 90 dpf at two different temperatures. See section 5.4 in SI Appendix and Table S1 for a complete description of the different gonad types. In **A** and **B**, data are shown as mean  $\pm$  s.e.m., whereas in **C** and **D** as mean. Same letter stands for no significant differences ( $P > 0.05$ , ANOVA). In panel **B**, lowercase: males; uppercase: females. Statistically significant differences between sampling points (**A**) or gonad maturation levels (**C** and **D**) are indicated by asterisks: \*\* =  $P < 0.01$ ; \*\*\* =  $P < 0.001$ ; NS, not significant; ANOVA.

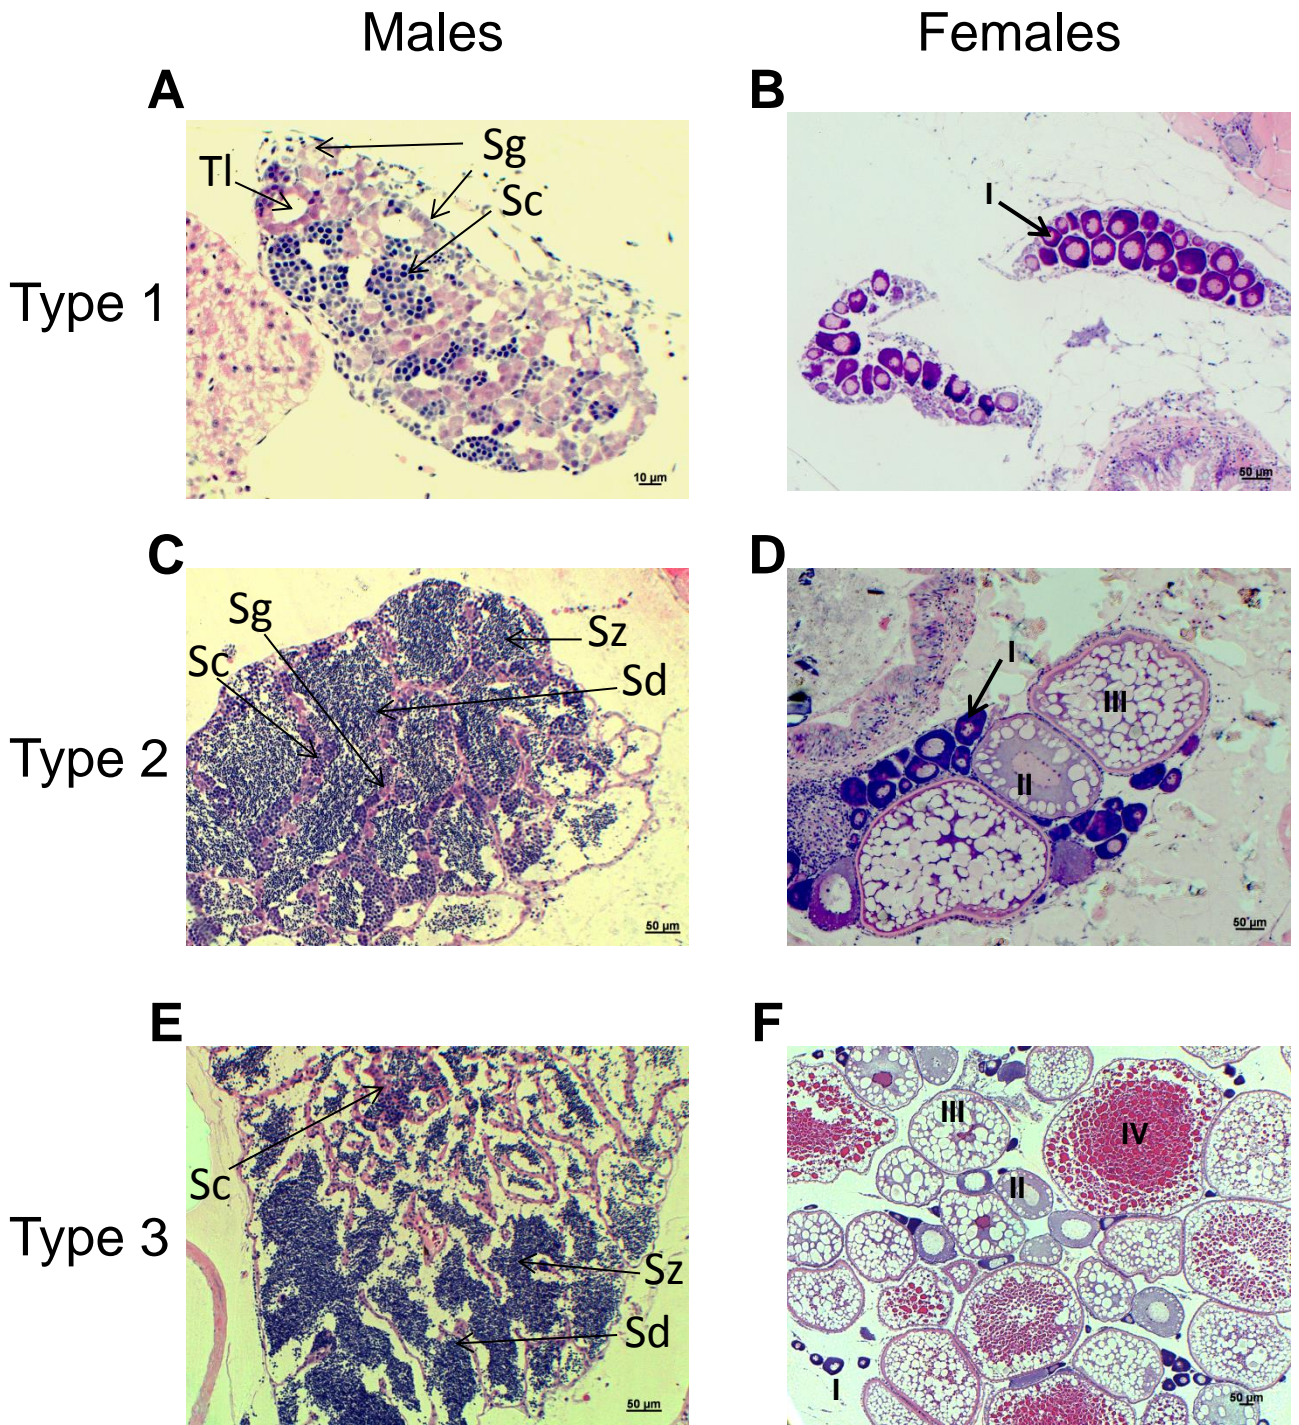

**Fig. S3.** Histological cross-section of testes (left panels) and ovaries (right panels) showing different degrees of development. (A) testis type 1; (B) ovary type 1; (C) testis type 2; (D) ovary type 2; (E) testis type 3; (F) ovary type 3. See section 5.4 in SI Appendix and Table S1 for a complete description of the different gonad types. Sg: spermatogonia; Sc: spermatocyte; Sd: spermatid; Sz: spermatozoa; Tl: testicular lobe; I, primary growth stage; II, cortical alveolus stage, III, early-vitellogenic stage; IV late-vitellogenic stage.



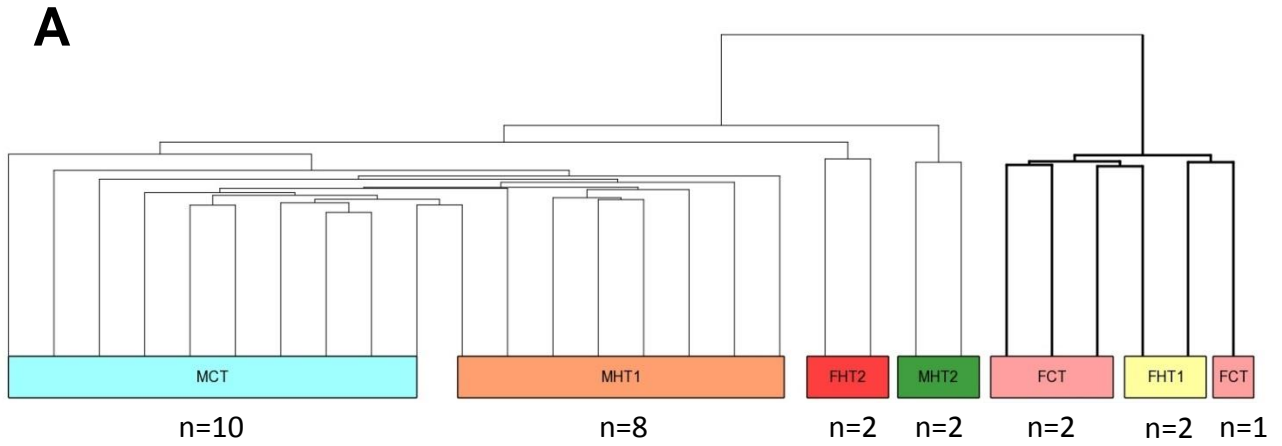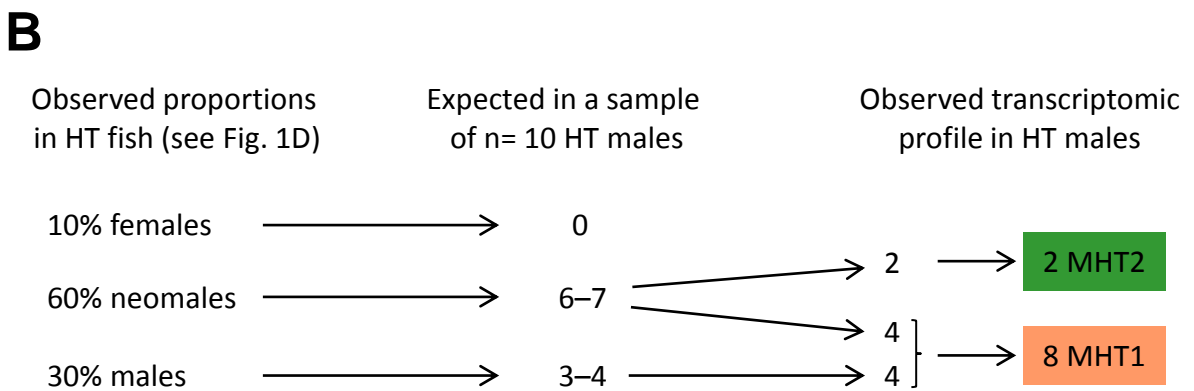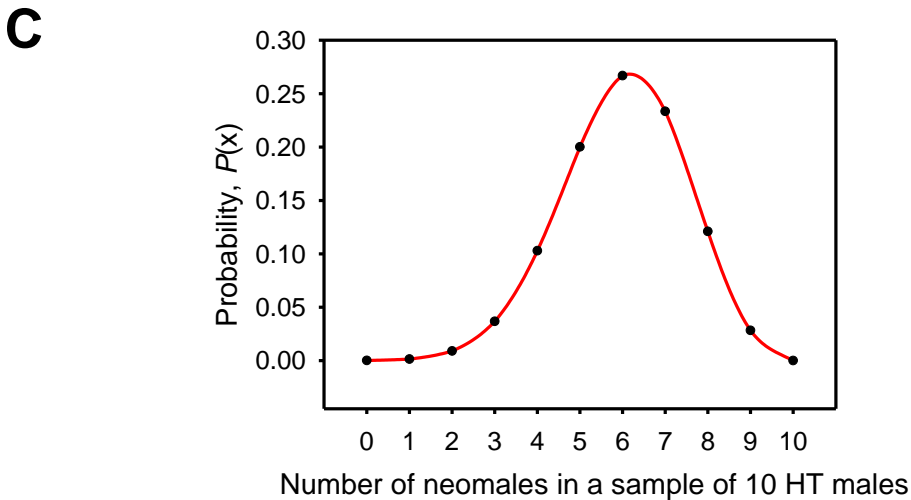

**Fig. S4.** Zebrafish phenotypes obtained after heat treatment. **(A)** Hierarchical clustering of adult control and heated zebrafish based on sex-related differentially expressed transcripts between MCT vs. FCT. The result supports the PCA plot shown in Fig. 1E and further strengthens the observation that the expression profile of FHT2 females is very similar to those of the males (MCT, MHT1 and MHT2). **(B)** Expected number of males and neomales and observed number of male transcriptomes. **(C)** The binomial probability plot corroborates that the number of neomales in a sample of 10 HT males should be between 6 and 7. See Table S2 for group abbreviations.

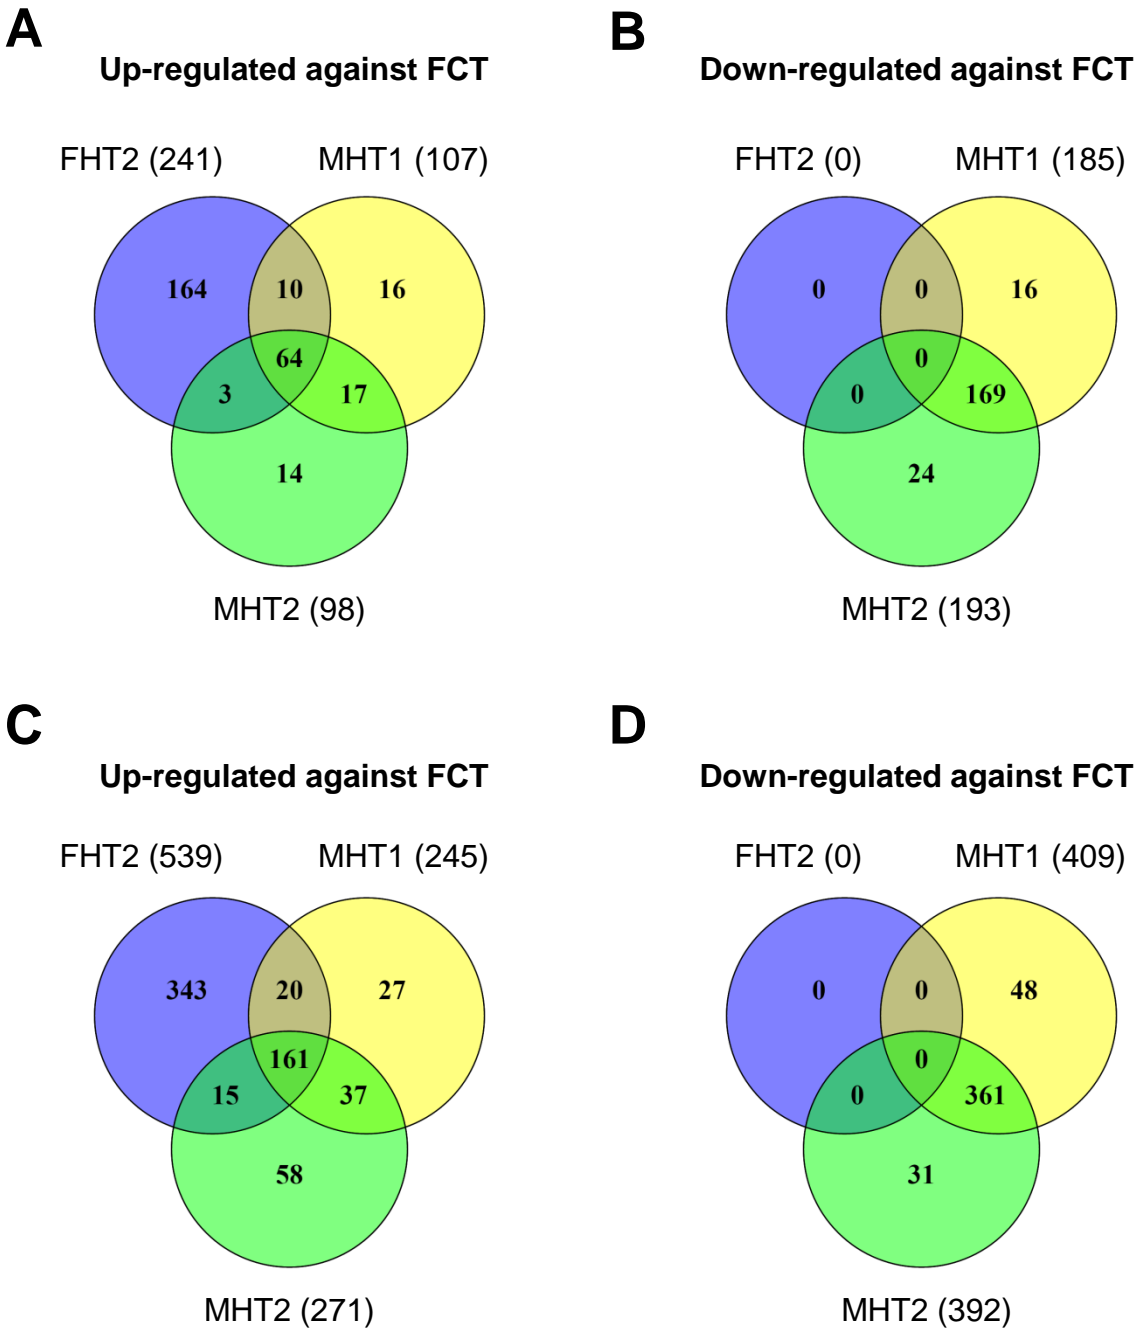

**Fig. S5.** Venn diagrams showing differentially expressed Cellular Component (**A, B**) and Molecular Functions (**C, D**) GO terms in heat-exposed zebrafish as determined by the expression microarray (Fold Change, 1.5x ; False Discovery Rate,  $P \leq 0.05$ ). (**A**) Cellular Component GO pathways up-regulated in MHT1, MHT2 or FHT2 in comparison to FCT; (**B**) Cellular Component GO pathways down-regulated in MHT1, MHT2 or FHT2 in comparison to FCT; (**C**) Molecular Functions GO pathways up-regulated in MHT1, MHT2 or FHT2 in comparison to FCT; (**D**) Molecular Functions GO pathways down-regulated in MHT1, MHT2 or FHT2 in comparison to FCT (see Fig. 2B and C for similar Venn diagrams showing differentially expressed Biological Process GO pathways, as well as Table S5 for the complete list of all GO pathways). See Table S2 for group abbreviations.

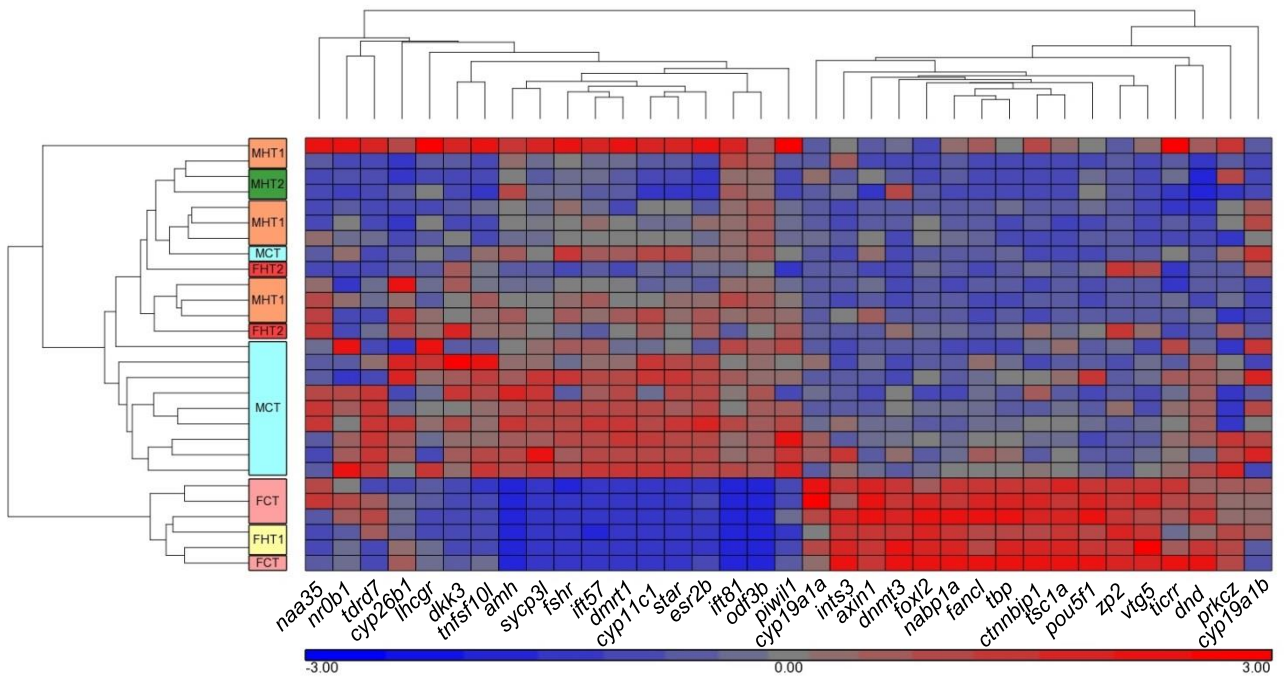

**Fig. S6.** Heatmap generated using the expression level of 35 genes in 90 dpf adults showing sex- and temperature-dependent transcriptomic profiles. Genes were selected either based on their putative role in reproduction or on their expression profile by qPCR among the different gonadal transcriptomal types. Gene name are listed in Table S7.

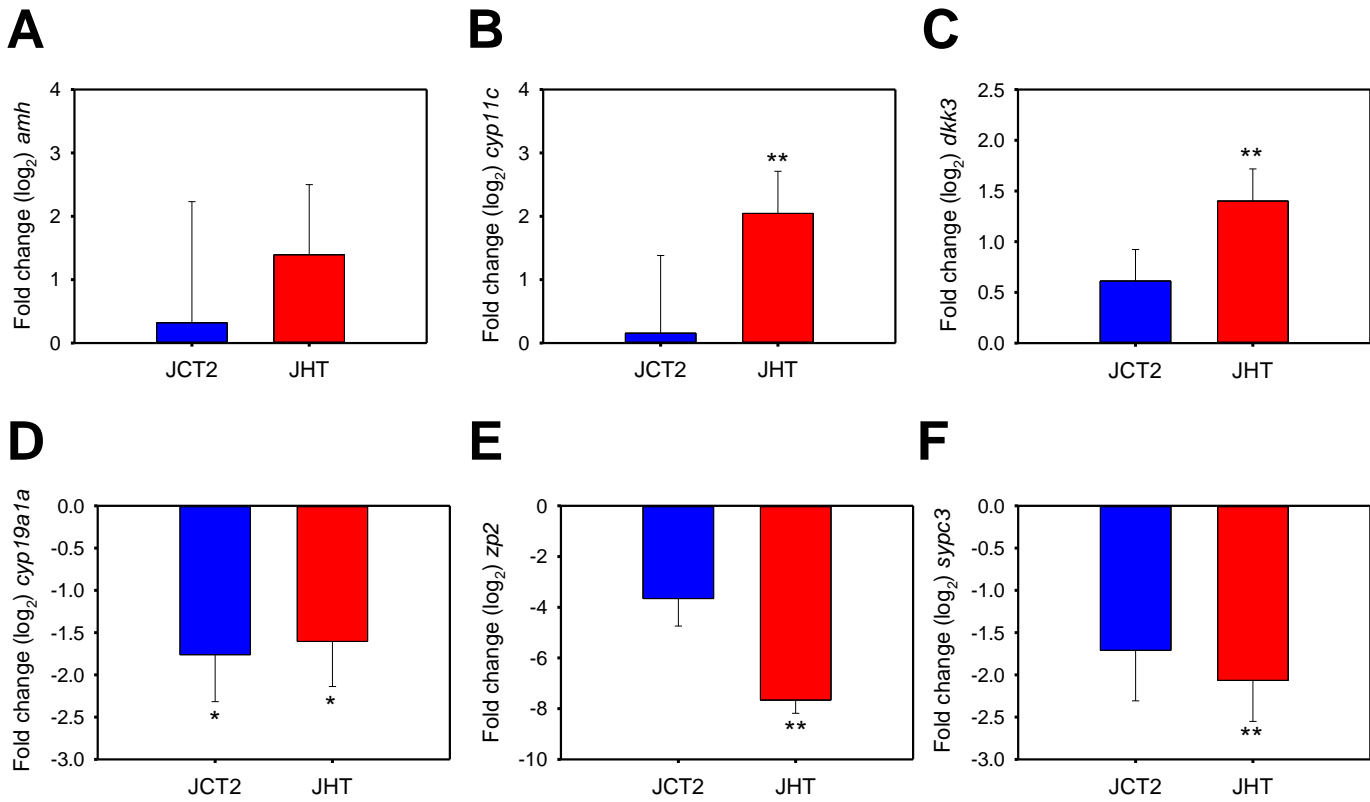

**Fig. S7.** Gene expression levels of six candidate genes with sex-associated function determined by qPCR at 37 dpf indicated that the juvenile heated group (JHT) transcriptome analysis shown in Fig. 4 corresponds to male gonads. Three genes with a ‘pro-male’ function were tested: *amh* (A), *cyp11c* (B), *dkk3* (C), and also three with ‘pro-female’ function: *cyp19a1a* (D), *zp2* (E) and *sypc3* (F). All comparison are against control females (JCT1). Values that show statistically significant differences (Student’s *t*-test) with JCT1 females (n = 5) are labeled with \* = *P* < 0.05 or \*\* = *P* < 0.01. Data as mean ± s.e.m. of three (JCT2) or ten (JHT) individuals.
